# Supplementary material for: Thyroglobulin levels in COVID-19-positive patients: Correlations with thyroid function tests, inflammatory markers, and glucocorticoid use
Source: PubMed Central journal article supplement (PMC10034180; doi:10.3389/fendo.2022.1031188), 2023-03-09
Supplement: Table_1.pdf [file Table_1.pdf]

Supplementary Table: Detailed information on used laboratory assays.

|     | Parameter   | Reference norm with units                                                                   | Laboratory                                                                                                              | Analytical method                                        | Laboratory kit                                                                                                                                                                                                                                      |
|-----|-------------|---------------------------------------------------------------------------------------------|-------------------------------------------------------------------------------------------------------------------------|----------------------------------------------------------|-----------------------------------------------------------------------------------------------------------------------------------------------------------------------------------------------------------------------------------------------------|
| 1.  | TSH         | 0.27-4.2 $\mu$ IU/ml                                                                        | Diagnostyka Laboratoria, Gdańsk, Poland                                                                                 | Electrochemiluminescence assay                           | Elecsys TSH, Roche Diagnostics, Germany, Ref. 08429324190                                                                                                                                                                                           |
| 2.  | fT4         | 12-22 pmol/l                                                                                | Diagnostyka Laboratoria, Gdańsk, Poland                                                                                 | Electrochemiluminescence assay                           | Elecsys FT4 III, Roche Diagnostics, Germany, Ref. 07976836190                                                                                                                                                                                       |
| 3.  | fT3         | 3.1-6.8 pmol/l                                                                              | Diagnostyka Laboratoria, Gdańsk, Poland                                                                                 | Electrochemiluminescence assay                           | Elecsys FT3 III, Roche Diagnostics, Germany, Ref. 06437206190                                                                                                                                                                                       |
| 4.  | T4          | 5.13-14.10 $\mu$ g/dl                                                                       | Diagnostyka Laboratoria, Gdańsk, Poland                                                                                 | Electrochemiluminescence assay                           | Elecsys T4, Roche Diagnostics, Germany, Ref. 09007784190                                                                                                                                                                                            |
| 5.  | TG          | 3.5-77 ng/ml                                                                                | Diagnostyka Laboratoria, Gdańsk, Poland                                                                                 | Electrochemiluminescence assay                           | Elecsys Tg II, Roche Diagnostics, Germany, Ref. 07027931190                                                                                                                                                                                         |
| 6.  | rT3         | i. <0.95 ng/ml<br>ii. 0.1-0.35 $\mu$ g/l                                                    | i. Central Clinical Laboratory, University Clinical Centre, Gdańsk, Poland<br>ii. Cerba International, Barcelona, Spain | i. Chemiluminescence immunoassay<br>ii. Radioimmunoassay | i. Maglumi Rev T3 (CLIA), Snibe Diagnostic, China, Ref. 130203010M<br>ii. Reverse T3-RIA, DiaSource ImmunoAssays, Belgium, Ref. R-EW-125                                                                                                            |
| 7.  | anti-TG abs | <10 IU/ml                                                                                   | Diagnostyka Laboratoria, Gdańsk, Poland                                                                                 | Electrochemiluminescence assay                           | Elecsys Anti-TG, Roche Diagnostics, Germany, Ref. 07026919190                                                                                                                                                                                       |
| 8.  | CRP         | 0-5 mg/l                                                                                    | Diagnostyka Laboratoria, Gdańsk, Poland                                                                                 | Immunoturbidimetric assay                                | Tina-quant C-Reactive Protein IV, Roche Diagnostics, Germany, Ref. 07876033190                                                                                                                                                                      |
| 9.  | IL-6        | <5.9 pg/ml                                                                                  | Central Clinical Laboratory, University Clinical Centre, Gdańsk, Poland                                                 | Chemiluminescence immunoassay                            | Immulite 2000 IL-6, Siemens Healthcare, Germany, Ref. L2K6P2                                                                                                                                                                                        |
| 10. | LEU         | females: 3.98-10.04x10 <sup>3</sup> / $\mu$ l<br>males: 4.23-9.07x10 <sup>3</sup> / $\mu$ l | Diagnostyka Laboratoria, Gdańsk, Poland                                                                                 | Fluorescence flow cytometry                              | Stromatolyser 4DS, Sysmex Corporation, Japan, Ref. 98417216;<br>Stromatolyser-FB, Sysmex Corporation, Japan, Ref. 94404613;<br>Stromatolyser 4DL, Sysmex Corporation, Japan, Ref. 98417615;<br>Sulfolyser, Sysmex Corporation, Japan, Ref. 90411414 |
| 11. | NEU         | 2-7x10 <sup>3</sup> / $\mu$ l                                                               | Diagnostyka Laboratoria, Gdańsk, Poland                                                                                 |                                                          |                                                                                                                                                                                                                                                     |
| 12. | LYMPH       | 1-3x10 <sup>3</sup> / $\mu$ l                                                               | Diagnostyka Laboratoria, Gdańsk, Poland                                                                                 |                                                          |                                                                                                                                                                                                                                                     |
